# Supplementary material
Source: PubMed Central journal article supplement (PMC4535989)

## SUPPLEMENTARY MATERIALS

### Interaction between mitsugumin 29 and TRPC3 participates in regulating $\text{Ca}^{2+}$ transients in skeletal muscle

Jin Seok Woo, Ji-Hye Hwang, Mei Huang, Mi Kyoung Ahn, Chung-Hyun Cho, Jianjie Ma, and Eun Hui Lee

#### Supplementary Material 1. PCR primers for the cloning of GST-fused MG29 portions or GFP-fused MG29 deletion mutants.

|                 | PCR primers |                                        |
|-----------------|-------------|----------------------------------------|
| GST-N-terminus  | forward     | 5'- GCGAATTCATGTCCTCGACGGAGAGCCCC -3'  |
|                 | backward    | 5'- GCGTCGACTTACTCCTCCAGGC -3'         |
| GST-I-II loop   | forward     | 5'- GCGAATTCATGAGCGGGGAGAC -3'         |
|                 | backward    | 5'- GCGTCGACTTACTCGGCGGGG -3'          |
| GST-II-III loop | forward     | 5'- CGAATTCATGCGCTTCCACAACTC -3'       |
|                 | backward    | 5'- GCGTCGACTTAGCGTTTGTCTCTGT -3'      |
| GST-III-IV loop | forward     | 5'- GCGAATTCATGAAGGGCTTGACTGACGTC -3'  |
|                 | backward    | 5'- GCGTCGACTTAAGAGAGGTTAGCCAGCCCC -3' |
| GST-C-terminus  | forward     | 5'- GCGAATTCATGAAAGAGACCCCC -3'        |
|                 | backward    | 5'- GCGTCGACTTACTGCTTCTCCACTGCCCC -3'  |
| GST-NF-1        | forward     | 5'- GCGAATTCATGTCCTCGACGGAGAGCCCC -3'  |
|                 | backward    | 5'- GCGTCGACTTACGGAGACTTGTCC -3'       |
| GST-NF-2        | forward     | 5'- GCGAATTCATGTCCTCGACGGAGAGCCCC -3'  |
|                 | backward    | 5'- GCGTCGACTTACCCAGGAGCAGGC -3'       |
| GST-NF-3        | forward     | 5'- GCGAATTCATGTCGGACAAGTCTCC -3'      |
|                 | backward    | 5'- GCGTCGACTTACTCCTCCAGGC -3'         |
| GST-NF-4        | forward     | 5'- GCGAATTCATGCGCCAGCAGGTGGACCG -3'   |
|                 | backward    | 5'- GCGTCGACTTACTCCTCCAGGC -3'         |
| GFP-Δ33-MG29    | forward     | 5'- GGGGATCCGGATGCCGCTGGGCTTCATC -3'   |
|                 | backward    | 5'- GCGATATCTTACTGCTTCTCCACTGCCC -3'   |
| GFP-Δ116-MG29   | forward     | 5'- GCGGATCCGGATGTTCTTTGTGACCCTT -3'   |
|                 | backward    | 5'- GCGATATCTTACTGCTTCTCCACTGCCC -3'   |

**Supplementary Material 2. Co-immunoprecipitation of TRPC3 with each smaller portion of the N-terminus in MG29.** (A) Schematic diagrams of the smaller portions of the N-terminus in MG29. Numbers indicate the sequence of amino acids. TM indicates transmembrane domain. (B) Immobilized GST-fused smaller portions of the N-terminus were separated on SDS-PAGE gel (12%), and the gel was stained with Coomassie Blue. Each portion was successfully expressed in *E. coli* (left). Co-immunoprecipitation of TRPC3 with each smaller portion of the N-terminus was conducted using a solubilized triad sample containing TRPC3, the lysate sample of *E. coli* expressing each GST-fused smaller portion, and anti-TRPC3 antibody. The protein complex was separated on SDS-PAGE gel (12%), and the gel was subjected to immunoblot assay with anti-TRPC3 or anti-GST antibody (right). GST was used as a negative control. IP or IB translates to immunoprecipitation or immunoblot. Three independent experiments were conducted and a representative result is presented. None of the smaller portions of the N-terminus were bound to TRPC3, suggesting that the intact N-terminus of MG29 is required for the binding of MG29 to TRPC3.

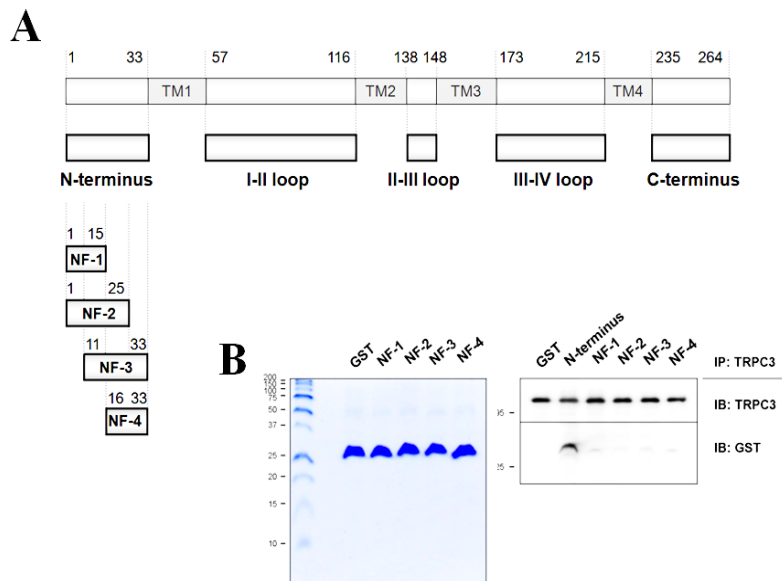

**Supplementary Material 3. Prediction of the secondary and three-dimensional (3D) structure or the ordered status of the TRPC3-binding region in MG29 (1-116 amino acids), and the prediction of phosphorylation site in the un-structured random coil in the N-terminus of MG29.** Based on mouse MG29 cDNA (GenBank accession No. AB010140.1), the secondary (**A**) and 3D structures of the TRPC3-binding region in MG29 (1 to 116 amino acids) (**B**) were predicted using RaptorX<sup>†</sup> which is a prediction program/server for the 3D structure of proteins by homology searches in amino acid sequences with other proteins with 3D structures that have been deposited in the Protein Data Bank (PDB). (**A**) The  $\alpha$ -helix,  $\beta$ -strand, and coil ( $\beta$ -turn or un-structured random coil) are colored in gray, white, and black, respectively. Numbers indicate the sequence of amino acids. (**B**) The 3D structure of the TRPC3-binding region in MG29 was predicted on the basis of the structure of a malate dehydrogenase (PDB accession No. 3NEP), and was presented as a ribbon diagram using the RasMol program (<http://www.rasmol.org/>). There are an un-structured random coil and a short  $\alpha$ -helix in the N-terminus, and 3 tandem  $\beta$ -strands in the I-II loop. The  $\alpha$ -helix,  $\beta$ -strand,  $\beta$ -turn, or un-structured random coil are presented as red helix, yellow strand, blue loop, or white loop, respectively. N or C translates as the N- or C-terminal end. TM1 is the first transmembrane. The right-hand image is the 90° counterclockwise rotation of the left-hand image along the vertical axis of the view. (**C**) The ordered status of each amino acid in the TRPC3-binding region in MG29 was predicted using the RaptorX program/server. The un-structured random coil in the N-terminus (20 amino acids from the first of MG29, colored in reddish brown) was predicted to exist as an intrinsically disordered state with high confidence scores. (**D**) The phosphorylation site for the un-structured random coil in the N-terminus was predicted using the NetPhos program/server<sup>‡</sup> that is a sequence- and structure-based prediction program of eukaryotic protein phosphorylation sites. Position numbers indicate the sequence of amino acids. Four amino acids in the un-structured random coil (20% of the total amino acids) were predicted as possible phosphorylation sites with high confidence scores: three serines (6th, 11th, or 14th amino acid colored in purple) and one threonine (10th amino acid colored in green).

<sup>†</sup>Kallberg, M., Wang, H., Wang, S., Peng, J., Wang, Z., Lu, H. & Xu, J. 2012. Template-based protein structure modeling using the RaptorX web server. *Nat Protoc*, **7**, 1511-22.

<sup>‡</sup>Blom, N., Gammeltoft, S. & Brunak, S. 1999. Sequence and structure-based prediction of eukaryotic protein phosphorylation sites. *J Mol Biol*, **294**, 1351-62.

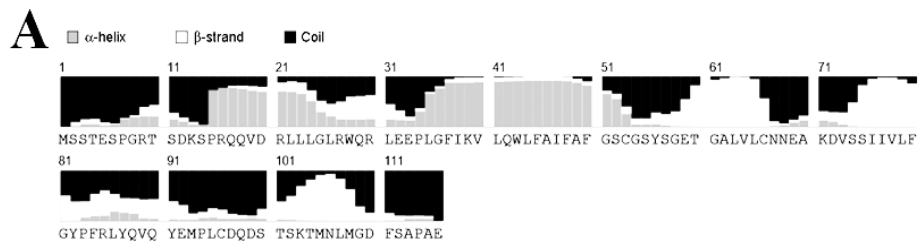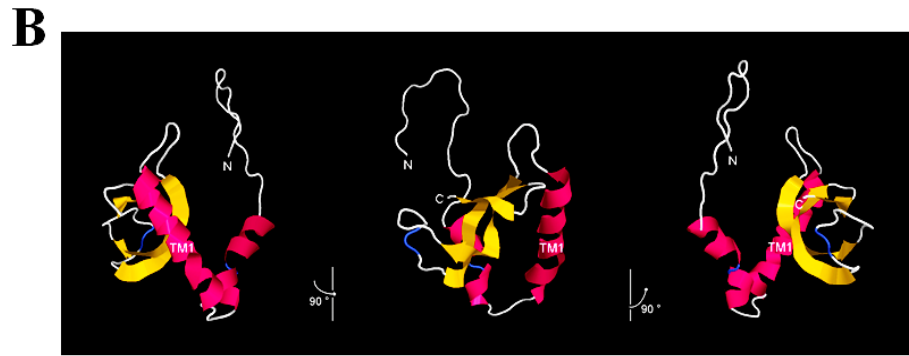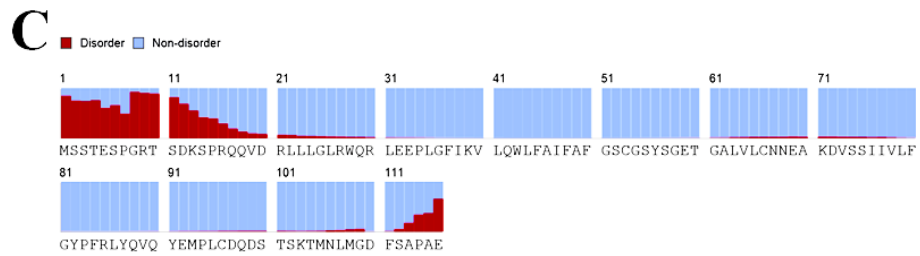

**D**

|          | Position | context                 | Confidence score | Predicted residue |
|----------|----------|-------------------------|------------------|-------------------|
|          |          | v                       |                  |                   |
| Sequence | 6        | SSTESPGRT               | 0.997            | *S*               |
| Sequence | 10       | SPGR <sup>v</sup> TSDKS | 0.666            | *T*               |
| Sequence | 11       | PGRT <sup>v</sup> SDKSP | 0.998            | *S*               |
| Sequence | 14       | TSDKS <sup>v</sup> PRQQ | 0.998            | *S*               |

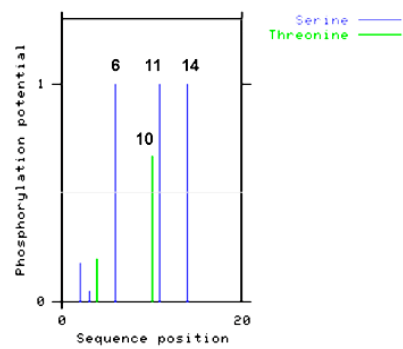

**Supplementary Material 4. Normal formations of junctional membrane complex (JMC) in mouse primary skeletal myotubes expressing  $\Delta 116$ -Mg29. (A)** JMC in the myotubes expressing wild-type MG29 or  $\Delta 116$ -MG29 was observed using a transmission electron microscopy using methods as previously described<sup>§</sup>. The SR indicates sarcoplasmic reticulum, and the white arrowhead indicates transverse (t)-tubule. Normal existence of the juxtaposed t-tubule and SR membranes was found in the myotubes expressing  $\Delta 116$ -MG29. **(B)** In the myotubes expressing  $\Delta 116$ -MG29, evenly spaced feet<sup>#</sup> between the t-tubule and the SR membranes (indicated by black arrows) were also easily found. Therefore, there was no significant change in the overall JMC formations by  $\Delta 116$ -MG29. *Bars* represent 0.2  $\mu\text{m}$ .

<sup>§</sup> J.S. Woo, C.H. Cho, K.J. Lee, H. Kim do, J. Ma, E.H. Lee, Hypertrophy in skeletal myotubes induced by junctophilin-2 mutant, Y141H, involves an increase in store-operated  $\text{Ca}^{2+}$  entry via Orai1, *J Biol Chem* 287 (2012) 14336-14348.

<sup>#</sup> C. Franzini-Armstrong, STUDIES OF THE TRIAD : I. Structure of the Junction in Frog Twitch Fibers, *J Cell Biol* 47 (1970) 488-499.

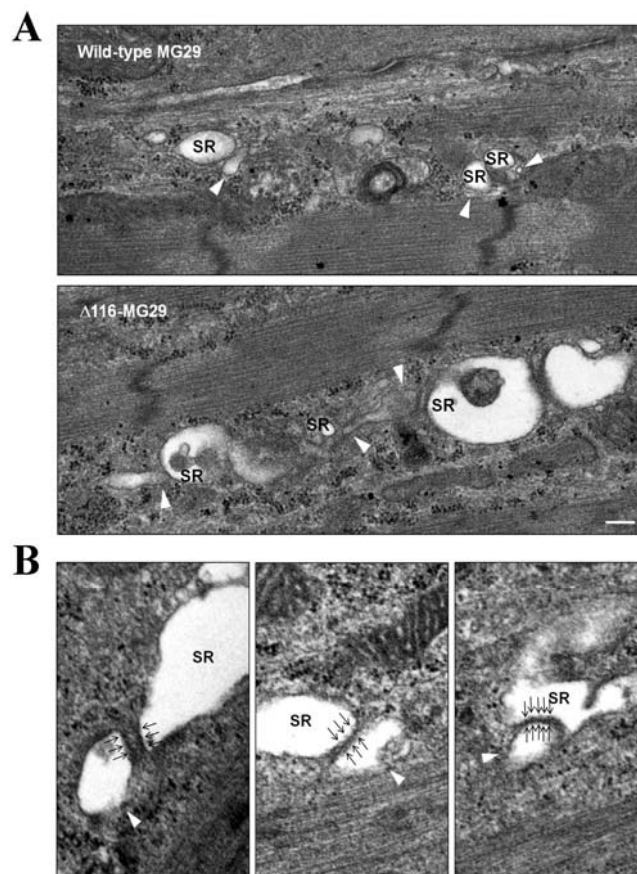

Supplement: NIHMS707523-supplement.pdf [file NIHMS707523-supplement.pdf]
